# Supplementary material
Source: HighWire-hosted journal article supplement (https://bmjopen.bmj.com/content/13/4/e070747)
Supplement: inline-supplementary-material-1 [file inline-supplementary-material-1.pdf]

**Table S1.** Odds ratios and confidence intervals for complete case and imputed multivariable logistic regressions considering standard PRESTO and the inclusion of time from injury to KCMC

| <b>Characteristic</b>              | <b>Standard<br/>OR (95% CI)<sup>12</sup></b> | <b>Std + Imp<br/>OR (95% CI)<sup>12</sup></b> | <b>Time Inj.<br/>OR (95% CI)<sup>12</sup></b> | <b>Time Inj. + Imp<br/>OR (95% CI)<sup>12</sup></b> |
|------------------------------------|----------------------------------------------|-----------------------------------------------|-----------------------------------------------|-----------------------------------------------------|
| <b>Age</b>                         |                                              |                                               |                                               |                                                     |
| Teen                               | —                                            | —                                             | —                                             | —                                                   |
| Child                              | 2.38 (0.26, 24.6)                            | 2.42 (0.34, 17.5)                             | 2.77 (0.29, 31.3)                             | 2.32 (0.31, 17.4)                                   |
| Preschool                          | 3.72 (0.06, 188)                             | 3.78 (0.19, 73.9)                             | 6.59 (0.11, 389)                              | 4.00 (0.19, 82.9)                                   |
| Todler                             | 9.31 (0.20, 558)                             | 6.87 (0.22, 215)                              | 15.1 (0.31, 1,036)                            | 7.59 (0.23, 256)                                    |
| Infant                             | 16.1 (0.14, 2,143)                           | 18.3 (0.30, 1,124)                            | 26.6 (0.21, 4,333)                            | 19.9 (0.30, 1,329)                                  |
| <b>AVPU</b>                        |                                              |                                               |                                               |                                                     |
| Alert                              | —                                            | —                                             | —                                             | —                                                   |
| Verbal                             | 6.09 (1.54, 22.1)**                          | 4.16 (1.13, 15.2)*                            | 7.22 (1.70, 28.9)**                           | 4.19 (1.12, 15.7)*                                  |
| Pain                               | 0.83 (0.10, 4.69)                            | 2.20 (0.50, 9.57)                             | 1.12 (0.12, 6.66)                             | 1.74 (0.38, 8.03)                                   |
| Unresponsive                       | 3.66 (0.55, 27.7)                            | 5.27 (1.06, 26.2)*                            | 6.17 (0.87, 51.2)                             | 5.82 (1.16, 29.1)*                                  |
| <b>Hypotension</b>                 |                                              |                                               |                                               |                                                     |
| Normal SBP                         | —                                            | —                                             | —                                             | —                                                   |
| Low SBP                            | 3.81 (0.29, 33.6)                            | 3.63 (0.54, 24.4)                             | 4.19 (0.31, 39.0)                             | 3.99 (0.54, 29.4)                                   |
| <b>Heart rate on arrival to ED</b> | 1.01 (0.99, 1.03)                            | 1.00 (0.98, 1.02)                             | 1.01 (0.99, 1.03)                             | 1.00 (0.98, 1.02)                                   |
| <b>Airway support</b>              |                                              |                                               |                                               |                                                     |
| No                                 | —                                            | —                                             | —                                             | —                                                   |
| Yes                                | 11.0 (3.34, 36.4)***                         | 11.0 (4.04, 30.1)***                          | 9.68 (2.80, 33.8)***                          | 11.7 (4.26, 32.2)***                                |
| <b>Pulse ox on arrival to ED</b>   | 0.92 (0.84, 1.02)                            | 0.96 (0.87, 1.05)                             | 0.93 (0.84, 1.02)                             | 0.96 (0.87, 1.05)                                   |
| <b>Heart rate on arrival to ED</b> | 1.00 (1.00, 1.00)                            | 1.00 (1.00, 1.00)                             | 1.00 (1.00, 1.00)                             | 1.00 (1.00, 1.00)                                   |
| <b>* age</b>                       |                                              |                                               |                                               |                                                     |
| <b>Time to KCMC (days)</b>         |                                              |                                               | 1.15 (1.04, 1.27)**                           | 1.04 (0.99, 1.08)                                   |

<sup>1</sup>\*p<0.05; \*\*p<0.01; \*\*\*p<0.001<sup>2</sup>OR = Odds Ratio
