# Supplementary material
Source: HighWire-hosted journal article supplement (https://bmjopen.bmj.com/content/13/4/e070747)
Supplement: inline-supplementary-material-2 [file inline-supplementary-material-2.pdf]

**Table S2.** Model performance comparison for imputed multivariable logistic regressions considering standard PRESTO and the inclusion of time to KCMC

| Model            | Training set     |                  |               |                  | Validation set   |                  |                  |                  |
|------------------|------------------|------------------|---------------|------------------|------------------|------------------|------------------|------------------|
|                  | ROC AUC          | Accuracy         | Sensitivity   | Specificity      | ROC AUC          | Accuracy         | Sensitivity      | Specificity      |
| PRESTO           | 0.9<br>(0.0239)  | 0.82<br>(0.0458) | 0.82 (0.035)  | 0.82<br>(0.0471) | 0.81<br>(0.0809) | 0.78<br>(0.0525) | 0.71<br>(0.1618) | 0.79<br>(0.0597) |
| PRESTO<br>+ Time | 0.92<br>(0.0213) | 0.84<br>(0.0216) | 0.84 (0.0204) | 0.84<br>(0.0218) | 0.79<br>(0.1194) | 0.83<br>(0.0432) | 0.63<br>(0.164)  | 0.84<br>(0.0421) |
